# Supplementary material
Source: PubMed Central journal article supplement (PMC4249438)
Supplement: AAC.02620-13_zac011143400so1.pdf [file AAC.02620-13_zac011143400so1.pdf]

**Supplementary Table S1.** List of genes in the RNA-Seq result that were found to be significantly up-regulated in *P. aeruginosa* upon 500  $\mu$ M iberin treatment. Up-regulation was defined as greater than 2-fold increase in the RNA-Seq result. Only genes showing a significant difference in expression from the control (i.e. p-value < 0.05) were selected.

| PA No. | Gene Name   | QS <sup>a</sup> | Description                                              | Fold Change | P value |
|--------|-------------|-----------------|----------------------------------------------------------|-------------|---------|
| PA0119 |             |                 | Probable dicarboxylate transporter                       | 2.2         | 0.03    |
| PA0132 |             |                 | Beta-alanine--pyruvate transaminase                      | 2.9         | 0.05    |
| PA0133 |             |                 | Probable transcriptional regulator                       | 4.2         | 0.01    |
| PA0161 |             |                 | Hypothetical protein                                     | 4.7         | 0.01    |
| PA0181 |             |                 | Probable transcriptional regulator                       | 2.2         | 0.03    |
| PA0182 |             |                 | Probable short-chain dehydrogenase                       | 7.6         | 0.04    |
| PA0185 |             |                 | Probable permease of ABC transporter                     | 8.9         | 0.04    |
| PA0201 |             |                 | Hypothetical protein                                     | 25.9        | 0.01    |
| PA0202 |             |                 | Probable amidase                                         | 20.7        | 0.03    |
| PA0234 |             |                 | Hypothetical protein                                     | 2.5         | 0.03    |
| PA0283 | <i>sbp</i>  |                 | Sulfate-binding protein precursor                        | 26.0        | 0.01    |
| PA0284 |             |                 | Hypothetical protein                                     | 32.9        | 0.04    |
| PA0450 |             |                 | Probable phosphate transporter                           | 2.1         | 0.05    |
| PA0485 |             |                 | Conserved hypothetical protein                           | 2.1         | 0.04    |
| PA0539 |             |                 | Hypothetical protein                                     | 2.1         | 0.04    |
| PA0709 |             |                 | Hypothetical protein                                     | 2.3         | 0.01    |
| PA0865 | <i>hpd</i>  |                 | 4-hydroxyphenylpyruvate dioxygenase                      | 42.2        | 0.04    |
| PA0878 |             |                 | Hypothetical protein                                     | 7.9         | 0.04    |
| PA0879 |             |                 | Probable acyl-CoA dehydrogenase                          | 4.1         | 0.05    |
| PA0905 | <i>rsmA</i> |                 | RsmA, regulator of secondary metabolites                 | 3.6         | 0.01    |
| PA1223 |             |                 | Probable transcriptional regulator                       | 2.7         | 0.04    |
| PA1226 |             |                 | Probable transcriptional regulator                       | 2.9         | 0.01    |
| PA1253 |             |                 | Probable semialdehyde dehydrogenase                      | 2.3         | 0.02    |
| PA1284 |             |                 | Probable acyl-CoA dehydrogenase                          | 2.2         | 0.01    |
| PA1285 |             |                 | Probable transcriptional regulator                       | 5.2         | 0.05    |
| PA1310 | <i>phnW</i> |                 | 2-aminoethylphosphonate:pyruvate aminotransferase        | 19.3        | 0.05    |
| PA1332 |             |                 | Hypothetical protein                                     | 17.7        | 0.05    |
| PA1334 |             |                 | Probable oxidoreductase                                  | 74.7        | 0.04    |
| PA1493 | <i>cysP</i> |                 | Sulfate-binding protein of ABC transporter               | 8.2         | <0.01   |
| PA1569 |             |                 | Probable major facilitator superfamily (MFS) transporter | 4.7         | 0.03    |
| PA1570 |             |                 | Probable transcriptional regulator                       | 2.7         | 0.05    |
| PA1602 |             |                 | Probable oxidoreductase                                  | 2.4         | <0.01   |
| PA1621 |             |                 | Probable hydrolase                                       | 2.8         | 0.04    |
| PA1738 |             |                 | Probable transcriptional regulator                       | 2.6         | 0.01    |
| PA1742 |             |                 | Probable amidotransferase                                | 3.1         | <0.01   |
| PA1756 | <i>cysH</i> |                 | 3-phosphoadenosine-5-phosphosulfate reductase            | 3.4         | 0.04    |

|        |              |   |                                                                             |       |       |
|--------|--------------|---|-----------------------------------------------------------------------------|-------|-------|
| PA1936 |              |   | Hypothetical protein                                                        | 2.1   | 0.02  |
| PA1999 | <i>dhcA</i>  |   | Probable CoA transferase, subunit A                                         | 9.1   | 0.01  |
| PA2000 | <i>dhcB</i>  |   | Probable CoA transferase, subunit B                                         | 9.5   | <0.01 |
| PA2001 | <i>atoB</i>  |   | Acetyl-CoA acetyltransferase                                                | 5.0   | 0.02  |
| PA2008 | <i>fahA</i>  |   | Fumarylacetoacetase                                                         | 54.8  | 0.03  |
| PA2009 | <i>hmgA</i>  |   | Homogentisate 1,2-dioxygenase                                               | 62.0  | 0.02  |
| PA2047 |              |   | Probable transcriptional regulator                                          | 2.1   | 0.04  |
| PA2086 |              |   | Probable epoxide hydrolase                                                  | 3.7   | 0.05  |
| PA2087 |              |   | Hypothetical protein                                                        | 2.4   | 0.05  |
| PA2090 |              |   | Hypothetical protein                                                        | 2.2   | 0.02  |
| PA2095 |              |   | Hypothetical protein                                                        | 4.4   | 0.03  |
| PA2220 |              |   | Probable transcriptional regulator                                          | 2.9   | 0.03  |
| PA2247 | <i>bkdA1</i> |   | 2-oxoisovalerate dehydrogenase (alpha subunit)                              | 2.2   | 0.04  |
| PA2250 | <i>lpdV</i>  |   | Lipoamide dehydrogenase-Val                                                 | 2.5   | 0.04  |
| PA2275 |              |   | Probable alcohol dehydrogenase (Zn-dependent)                               | 3.4   | 0.04  |
| PA2277 | <i>arsR</i>  |   | ArsR protein                                                                | 15.3  | 0.05  |
| PA2278 | <i>arsB</i>  |   | ArsB protein                                                                | 9.6   | 0.02  |
| PA2310 |              |   | Hypothetical protein                                                        | 20.5  | 0.03  |
| PA2311 |              |   | Hypothetical protein                                                        | 51.8  | 0.05  |
| PA2312 |              |   | Probable transcriptional regulator                                          | 29.6  | <0.01 |
| PA2326 |              |   | Hypothetical protein                                                        | 3.0   | 0.01  |
| PA2327 |              | x | Probable permease of ABC transporter                                        | 6.6   | 0.05  |
| PA2359 |              |   | Probable transcriptional regulator                                          | 34.5  | 0.03  |
| PA2444 | <i>glyA2</i> |   | Serine hydroxymethyltransferase                                             | 37.4  | 0.05  |
| PA2481 |              |   | Hypothetical protein                                                        | 2.0   | 0.01  |
| PA2483 |              |   | Conserved hypothetical protein                                              | 3.7   | 0.03  |
| PA2484 |              |   | Conserved hypothetical protein                                              | 2.1   | <0.01 |
| PA2490 |              |   | Conserved hypothetical protein                                              | 16.4  | 0.05  |
| PA2491 |              |   | Probable oxidoreductase                                                     | 34.1  | 0.03  |
| PA2494 | <i>mexF</i>  |   | Resistance-Nodulation-Cell Division (RND) multidrug efflux transporter MexF | 129.4 | 0.04  |
| PA2495 | <i>oprN</i>  |   | Multidrug efflux outer membrane protein OprN precursor                      | 102.3 | 0.03  |
| PA2535 |              |   | Probable oxidoreductase                                                     | 4.8   | 0.05  |
| PA2575 |              |   | Hypothetical protein                                                        | 28.5  | 0.02  |
| PA2576 |              |   | Hypothetical protein                                                        | 2.3   | 0.01  |
| PA2578 |              |   | Probable acetyltransferase                                                  | 2.7   | 0.02  |
| PA2579 | <i>kynA</i>  |   | L-Tryptophan:oxygen 2,3-oxidoreductase (deacylizing) KynA                   | 5.3   | 0.05  |
| PA2580 |              |   | Conserved hypothetical protein                                              | 26.1  | 0.01  |
| PA2593 | <i>qteE</i>  | x | Hypothetical protein                                                        | 2.1   | <0.01 |
| PA2594 |              | x | Conserved hypothetical protein                                              | 9.0   | 0.02  |
| PA2599 |              |   | Conserved hypothetical protein                                              | 12.1  | 0.05  |
| PA2600 |              |   | Hypothetical protein                                                        | 21.0  | <0.01 |
| PA2610 |              |   | Conserved hypothetical protein                                              | 5.2   | 0.03  |

|        |             |                                                            |       |       |
|--------|-------------|------------------------------------------------------------|-------|-------|
| PA2636 |             | Hypothetical protein                                       | 2.8   | 0.02  |
| PA2641 | <i>nuoF</i> | NADH dehydrogenase I chain F                               | 2.4   | 0.02  |
| PA2642 | <i>nuoG</i> | NADH dehydrogenase I chain G                               | 2.4   | <0.01 |
| PA2643 | <i>nuoH</i> | NADH dehydrogenase I chain H                               | 2.3   | 0.02  |
| PA2645 | <i>nuoJ</i> | NADH dehydrogenase I chain J                               | 2.4   | 0.01  |
| PA2647 | <i>nuoL</i> | NADH dehydrogenase I chain L                               | 2.1   | 0.01  |
| PA2648 | <i>nuoM</i> | NADH dehydrogenase I chain M                               | 2.2   | 0.03  |
| PA2649 | <i>nuoN</i> | NADH dehydrogenase I chain N                               | 2.1   | 0.05  |
| PA2665 |             | Probable transcriptional regulator                         | 2.9   | 0.04  |
| PA2711 |             | Probable periplasmic spermidine/putrescine-binding protein | 2.3   | 0.01  |
| PA2714 |             | Probable molybdopterin oxidoreductase                      | 3.2   | <0.01 |
| PA2715 |             | Probable ferredoxin                                        | 2.4   | 0.01  |
| PA2758 |             | Probable transcriptional regulator                         | 63.7  | 0.02  |
| PA2759 |             | Hypothetical protein                                       | 179.3 | 0.01  |
| PA2766 |             | Probable transcriptional regulator                         | 2.7   | 0.04  |
| PA2767 |             | Probable enoyl-CoA hydratase/isomerase                     | 5.8   | 0.03  |
| PA2768 |             | Hypothetical protein                                       | 2.5   | 0.04  |
| PA2786 |             | Hypothetical protein                                       | 8.6   | 0.05  |
| PA2812 |             | Probable ATP-binding component of ABC transporter          | 20.4  | 0.03  |
| PA2813 |             | Probable glutathione S-transferase                         | 32.7  | 0.04  |
| PA2844 |             | Conserved hypothetical protein                             | 8.3   | 0.04  |
| PA2845 |             | Hypothetical protein                                       | 91.2  | 0.04  |
| PA2846 |             | Probable transcriptional regulator                         | 2.9   | 0.03  |
| PA2881 |             | Probable two-component response regulator                  | 4.3   | 0.03  |
| PA2930 |             | Probable transcriptional regulator                         | 2.7   | 0.05  |
| PA2931 | <i>cifR</i> | CifR                                                       | 10.4  | 0.03  |
| PA2932 | <i>morB</i> | Morphinone reductase                                       | 45.7  | 0.03  |
| PA3035 |             | Probable glutathione S-transferase                         | 8.0   | <0.01 |
| PA3176 | <i>gltS</i> | Glutamate/sodium ion symporter, GltS                       | 2.2   | 0.02  |
| PA3222 |             | Hypothetical protein                                       | 5.4   | 0.04  |
| PA3229 |             | Hypothetical protein                                       | 311.5 | 0.04  |
| PA3230 |             | Conserved hypothetical protein                             | 69.5  | 0.01  |
| PA3424 |             | Hypothetical protein                                       | 2.2   | 0.05  |
| PA3446 |             | Conserved hypothetical protein                             | 63.5  | 0.05  |
| PA3450 |             | Probable antioxidant protein                               | 39.4  | 0.01  |
| PA3630 |             | Probable transcriptional regulator                         | 3.7   | 0.03  |
| PA3663 |             | Hypothetical protein                                       | 2.1   | 0.02  |
| PA3893 |             | Conserved hypothetical protein                             | 2.5   | 0.05  |
| PA3927 |             | Probable transcriptional regulator                         | 3.1   | 0.02  |
| PA3931 |             | Conserved hypothetical protein                             | 44.7  | 0.05  |
| PA3938 |             | Probable periplasmic taurine-binding protein precursor     | 24.5  | 0.05  |
| PA3971 |             | Hypothetical protein                                       | 2.2   | <0.01 |
| PA4166 |             | Probable acetyltransferase                                 | 77.6  | 0.02  |

|        |              |                                                          |       |       |
|--------|--------------|----------------------------------------------------------|-------|-------|
| PA4167 |              | Probable oxidoreductase                                  | 112.0 | <0.01 |
| PA4173 |              | Conserved hypothetical protein                           | 12.4  | 0.01  |
| PA4288 |              | Probable transcriptional regulator                       | 3.9   | 0.02  |
| PA4355 |              | Probable major facilitator superfamily (MFS) transporter | 37.3  | <0.01 |
| PA4385 | <i>groEL</i> | GroEL protein                                            | 6.4   | 0.04  |
| PA4386 | <i>groES</i> | GroES protein                                            | 6.4   | 0.03  |
| PA4387 |              | Conserved hypothetical protein                           | 8.0   | 0.05  |
| PA4442 | <i>cysN</i>  | ATP sulfurylase GTP-binding subunit/APS kinase           | 4.5   | 0.04  |
| PA4443 | <i>cysD</i>  | ATP sulfurylase small subunit                            | 3.8   | <0.01 |
| PA4475 |              | Conserved hypothetical protein                           | 2.4   | 0.05  |
| PA4623 |              | Hypothetical protein                                     | 727.4 | 0.01  |
| PA4630 |              | Hypothetical protein                                     | 3.2   | 0.03  |
| PA4918 |              | Hypothetical protein                                     | 3.0   | 0.01  |
| PA4919 | <i>pncB1</i> | Nicotinate phosphoribosyltransferase                     | 2.8   | 0.02  |
| PA4920 | <i>nadE</i>  | NH <sub>3</sub> -dependent NAD synthetase                | 2.1   | 0.02  |
| PA4921 |              | Hypothetical protein                                     | 2.4   | 0.02  |
| PA4980 |              | Probable enoyl-CoA hydratase/isomerase                   | 3.9   | 0.02  |
| PA4985 |              | Hypothetical protein                                     | 2.1   | 0.03  |
| PA5103 |              | Hypothetical protein                                     | 2.4   | 0.04  |
| PA5105 | <i>hutC</i>  | Histidine utilization repressor HutC                     | 2.1   | 0.02  |
| PA5106 |              | Conserved hypothetical protein                           | 2.2   | 0.02  |
| PA5246 |              | Conserved hypothetical protein                           | 2.2   | 0.02  |
| PA5429 | <i>aspA</i>  | Aspartate ammonia-lyase                                  | 4.6   | <0.01 |
| PA5446 |              | Hypothetical protein                                     | 2.8   | 0.02  |

<sup>a</sup>An 'X' in the box indicates that the gene/protein is regulated by quorum sensing (1), in reference to the QS-regulated genes/proteins as determined previously.

**Supplementary Table S2.** List of genes in the RNA-Seq result that were found to be significantly down-regulated in *P. aeruginosa* upon 500  $\mu$ M iberin treatment. Down-regulation was defined as greater than 2-fold increase in the RNA-Seq result. Only genes showing a significant difference in expression from the control (i.e. p-value < 0.05) were selected.

| PA No. | Gene Name   | QS <sup>a</sup> | Description                               | Fold Change | P value |
|--------|-------------|-----------------|-------------------------------------------|-------------|---------|
| PA0027 |             | x               | Hypothetical protein                      | -3.3        | 0.04    |
| PA0028 |             |                 | Hypothetical protein                      | -3.3        | 0.04    |
| PA0029 |             |                 | Probable sulfate transporter              | -2.0        | 0.03    |
| PA0039 |             |                 | Hypothetical protein                      | -2.5        | 0.05    |
| PA0044 | <i>exoT</i> |                 | Exoenzyme T                               | -2.0        | 0.02    |
| PA0122 | <i>rahU</i> | x               | RahU                                      | -32.8       | 0.05    |
| PA0123 |             |                 | Probable transcriptional regulator        | -4.6        | 0.05    |
| PA0143 | <i>nuh</i>  | x               | Purine nucleosidase Nuh                   | -3.8        | 0.05    |
| PA0179 |             |                 | Probable two-component response regulator | -3.1        | 0.03    |
| PA0200 |             |                 | Hypothetical protein                      | -4.6        | 0.04    |
| PA0208 | <i>mdcA</i> |                 | Malonate decarboxylase alpha subunit      | -3.1        | 0.01    |
| PA0211 | <i>mdcD</i> |                 | Malonate decarboxylase beta subunit       | -3.6        | 0.02    |
| PA0212 | <i>mdcE</i> |                 | Malonate decarboxylase gamma subunit      | -3.2        | 0.03    |
| PA0346 |             |                 | Hypothetical protein                      | -3.6        | 0.03    |
| PA0460 |             |                 | Hypothetical protein                      | -2.3        | 0.05    |
| PA0471 |             |                 | Probable transmembrane sensor             | -3.1        | 0.02    |
| PA0472 |             |                 | Probable sigma-70 factor                  | -3.6        | 0.03    |
| PA0519 | <i>nirS</i> |                 | Nitrite reductase precursor               | -2.2        | 0.04    |
| PA0523 | <i>norC</i> |                 | Nitric-oxide reductase subunit C          | -10.9       | 0.04    |
| PA0524 | <i>norB</i> |                 | Nitric-oxide reductase subunit B          | -3.9        | <0.01   |
| PA0526 |             |                 | Hypothetical protein                      | -4.7        | 0.05    |
| PA0572 |             | x               | Hypothetical protein                      | -3.7        | <0.01   |
| PA0619 |             |                 | Probable bacteriophage protein            | -2.5        | 0.03    |
| PA0623 |             |                 | Probable bacteriophage protein            | -2.6        | 0.04    |
| PA0625 |             |                 | Hypothetical protein                      | -2.6        | 0.05    |
| PA0626 |             |                 | Hypothetical protein                      | -2.5        | 0.01    |
| PA0629 |             |                 | Conserved hypothetical protein            | -2.4        | 0.04    |
| PA0633 |             |                 | Hypothetical protein                      | -2.4        | <0.01   |
| PA0634 |             |                 | Hypothetical protein                      | -2.5        | 0.05    |
| PA0638 |             |                 | Probable bacteriophage protein            | -2.4        | 0.01    |
| PA0639 |             |                 | Conserved hypothetical protein            | -2.2        | 0.04    |
| PA0640 |             |                 | Probable bacteriophage protein            | -2.2        | 0.05    |
| PA0707 | <i>toxR</i> |                 | Transcriptional regulator ToxR            | -5.4        | 0.02    |
| PA0718 |             |                 | Hypothetical protein of bacteriophage Pf1 | -3.1        | 0.05    |
| PA0722 |             |                 | Hypothetical protein of bacteriophage Pf1 | -2.3        | 0.04    |
| PA0795 | <i>prpC</i> |                 | Citrate synthase 2                        | -2.4        | 0.05    |

|        |               |   |                                                                                  |       |       |
|--------|---------------|---|----------------------------------------------------------------------------------|-------|-------|
| PA0796 | <i>prpB</i>   |   | Carboxyphosphoenolpyruvate phosphonmutase                                        | -3.9  | 0.05  |
| PA0807 | <i>ampDh3</i> |   | AmpDh3                                                                           | -2.4  | 0.02  |
| PA0852 | <i>cbpD</i>   | x | Chitin-binding protein CbpD precursor                                            | -22.0 | 0.04  |
| PA0958 | <i>oprD</i>   |   | Basic amino acid, basic peptide and imipenem outer membrane porin OprD precursor | -2.0  | 0.01  |
| PA0996 | <i>pqsA</i>   | x | Probable coenzyme A ligase                                                       | -3.1  | 0.05  |
| PA0997 | <i>pqsB</i>   | x | PqsB                                                                             | -4.0  | 0.05  |
| PA1000 | <i>pqsE</i>   | x | Quinolone signal response protein                                                | -4.4  | 0.05  |
| PA1001 | <i>phnA</i>   | x | Anthranilate synthase component I                                                | -7.2  | 0.01  |
| PA1002 | <i>phnB</i>   | x | Anthranilate synthase component II                                               | -4.8  | 0.02  |
| PA1003 | <i>mvfR</i>   | x | Transcriptional regulator MvfR                                                   | -2.5  | 0.03  |
| PA1092 | <i>fliC</i>   |   | Flagellin type B                                                                 | -2.1  | <0.01 |
| PA1127 |               |   | Probable oxidoreductase                                                          | -3.6  | 0.05  |
| PA1129 |               |   | Probable fosfomycin resistance protein                                           | -3.9  | 0.02  |
| PA1130 | <i>rhIC</i>   | x | Rhamnosyltransferase 2                                                           | -11.7 | 0.04  |
| PA1131 |               | x | Probable major facilitator superfamily (MFS) transporter                         | -8.9  | 0.05  |
| PA1134 |               |   | Hypothetical protein                                                             | -6.0  | 0.01  |
| PA1196 |               | x | Probable transcriptional regulator                                               | -2.4  | 0.02  |
| PA1212 |               |   | Probable major facilitator superfamily (MFS) transporter                         | -3.3  | <0.01 |
| PA1214 |               |   | Hypothetical protein                                                             | -8.2  | 0.03  |
| PA1215 |               |   | Hypothetical protein                                                             | -7.7  | 0.02  |
| PA1216 |               |   | Hypothetical protein                                                             | -9.0  | 0.04  |
| PA1217 |               |   | Probable 2-isopropylmalate synthase                                              | -4.4  | 0.03  |
| PA1219 |               |   | Hypothetical protein                                                             | -2.9  | 0.05  |
| PA1220 |               |   | Hypothetical protein                                                             | -5.4  | 0.03  |
| PA1221 |               |   | Hypothetical protein                                                             | -6.8  | 0.04  |
| PA1245 |               |   | Hypothetical protein                                                             | -2.2  | 0.05  |
| PA1289 |               |   | Hypothetical protein                                                             | -4.0  | 0.01  |
| PA1300 |               |   | Probable sigma-70 factor, ECF subfamily                                          | -5.5  | 0.03  |
| PA1301 |               |   | Probable transmembrane sensor                                                    | -3.7  | 0.04  |
| PA1323 |               | x | Hypothetical protein                                                             | -6.9  | 0.03  |
| PA1324 |               | x | Hypothetical protein                                                             | -7.7  | 0.05  |
| PA1516 |               |   | Hypothetical protein                                                             | -2.0  | 0.04  |
| PA1518 |               |   | Conserved hypothetical protein                                                   | -2.1  | 0.03  |
| PA1519 |               |   | Probable transporter                                                             | -2.2  | 0.01  |
| PA1559 |               |   | Hypothetical protein                                                             | -7.3  | 0.03  |
| PA1560 |               |   | Hypothetical protein                                                             | -8.9  | 0.02  |
| PA1579 |               |   | Hypothetical protein                                                             | -2.2  | 0.02  |
| PA1673 |               |   | Hypothetical protein                                                             | -3.1  | 0.01  |
| PA1697 |               |   | ATP synthase in type III secretion system                                        | -2.3  | 0.02  |
| PA1705 | <i>pcrG</i>   |   | Regulator in type III secretion                                                  | -7.3  | 0.03  |
| PA1706 | <i>pcrV</i>   |   | Type III secretion protein PcrV                                                  | -6.1  | 0.03  |
| PA1708 |               |   | Translocator protein PopB                                                        | -6.7  | 0.03  |

|        |             |   |                                                                        |        |       |
|--------|-------------|---|------------------------------------------------------------------------|--------|-------|
| PA1710 | <i>exsC</i> |   | ExsC                                                                   | -6.6   | 0.01  |
| PA1711 | <i>exsE</i> |   | ExsE                                                                   | -4.4   | 0.01  |
| PA1712 | <i>exsB</i> |   | Exoenzyme S synthesis protein B                                        | -4.5   | 0.04  |
| PA1714 | <i>exsD</i> |   | ExsD                                                                   | -3.2   | <0.01 |
| PA1716 | <i>pscC</i> |   | Type III secretion outer membrane protein PscC precursor               | -2.1   | 0.01  |
| PA1720 | <i>pscG</i> |   | Type III export protein PscG                                           | -2.6   | 0.03  |
| PA1774 | <i>cfrX</i> |   | CfrX protein                                                           | -3.8   | 0.03  |
| PA1775 | <i>cmpX</i> |   | Conserved cytoplasmic membrane protein, CmpX protein                   | -3.6   | 0.03  |
| PA1871 | <i>lasA</i> | x | LasA protease precursor                                                | -25.5  | 0.02  |
| PA1875 |             | x | Probable outer membrane protein precursor                              | -5.1   | 0.04  |
| PA1878 |             |   | Hypothetical protein                                                   | -4.2   | 0.02  |
| PA1891 |             | x | Hypothetical protein                                                   | -2.5   | 0.04  |
| PA1894 |             |   | Hypothetical protein                                                   | -3.0   | 0.03  |
| PA1898 | <i>qscR</i> |   | Quorum-sensing control repressor                                       | -3.0   | 0.02  |
| PA1906 |             |   | Hypothetical protein                                                   | -20.4  | 0.01  |
| PA1911 | <i>femR</i> |   | Probable transmembrane sensor                                          | -3.2   | 0.03  |
| PA1912 | <i>femI</i> |   | Probable sigma-70 factor, ECF subfamily                                | -5.1   | 0.01  |
| PA1914 |             | x | Conserved hypothetical protein                                         | -14.0  | 0.02  |
| PA1934 |             |   | Hypothetical protein                                                   | -2.1   | 0.02  |
| PA2015 | <i>liuA</i> |   | Putative isovaleryl-CoA dehydrogenase                                  | -2.4   | 0.04  |
| PA2016 | <i>liuR</i> |   | Regulator of liu genes                                                 | -2.3   | 0.04  |
| PA2018 |             |   | Resistance-Nodulation-Cell Division (RND) multidrug efflux transporter | -2.2   | <0.01 |
| PA2020 |             |   | Probable transcriptional regulator                                     | -2.1   | 0.03  |
| PA2064 | <i>pcoB</i> |   | Copper resistance Protein B precursor                                  | -2.2   | 0.02  |
| PA2067 |             |   | Probable hydrolase                                                     | -16.4  | 0.04  |
| PA2068 |             | x | Probable major facilitator superfamily (MFS) transporter               | -37.5  | 0.02  |
| PA2069 |             | x | Probable carbamoyl transferase                                         | -107.8 | 0.02  |
| PA2070 |             | x | Hypothetical protein                                                   | -2.6   | <0.01 |
| PA2076 |             | x | Probable transcriptional regulator                                     | -2.1   | 0.05  |
| PA2081 | <i>kynB</i> |   | Kynurenine formamidase, KynB                                           | -2.1   | 0.01  |
| PA2119 |             |   | Alcohol dehydrogenase (Zn-dependent)                                   | -2.1   | 0.05  |
| PA2140 |             |   | Probable metallothionein                                               | -3.3   | 0.03  |
| PA2149 |             |   | Hypothetical protein                                                   | -4.5   | 0.02  |
| PA2150 |             |   | Conserved hypothetical protein                                         | -3.3   | 0.04  |
| PA2151 |             |   | Conserved hypothetical protein                                         | -2.3   | 0.04  |
| PA2154 |             |   | Conserved hypothetical protein                                         | -3.2   | 0.02  |
| PA2157 |             |   | Hypothetical protein                                                   | -2.5   | <0.01 |
| PA2159 |             |   | Conserved hypothetical protein                                         | -5.4   | 0.04  |
| PA2160 |             |   | Probable glycosyl hydrolase                                            | -3.6   | 0.02  |
| PA2162 |             |   | Probable glycosyl hydrolase                                            | -3.7   | 0.02  |
| PA2163 |             |   | Hypothetical protein                                                   | -4.3   | 0.02  |
| PA2164 |             |   | Probable glycosyl hydrolase                                            | -2.9   | 0.02  |

|        |             |   |                                                   |       |       |
|--------|-------------|---|---------------------------------------------------|-------|-------|
| PA2165 |             |   | Probable glycogen synthase                        | -3.4  | <0.01 |
| PA2167 |             |   | Hypothetical protein                              | -5.3  | 0.02  |
| PA2168 |             |   | Hypothetical protein                              | -4.6  | 0.05  |
| PA2169 |             |   | Hypothetical protein                              | -6.7  | 0.03  |
| PA2170 |             |   | Hypothetical protein                              | -9.1  | 0.04  |
| PA2175 |             |   | Hypothetical protein                              | -2.4  | 0.01  |
| PA2179 |             |   | Hypothetical protein                              | -2.4  | 0.03  |
| PA2193 | <i>hcnA</i> | x | Hydrogen cyanide synthase HcnA                    | -27.7 | 0.05  |
| PA2194 | <i>hcnB</i> | x | Hydrogen cyanide synthase HcnB                    | -15.9 | 0.01  |
| PA2195 | <i>hcnC</i> | x | Hydrogen cyanide synthase HcnC                    | -12.6 | <0.01 |
| PA2300 | <i>chiC</i> | x | Chitinase                                         | -29.9 | 0.03  |
| PA2320 | <i>gntR</i> |   | Transcriptional regulator GntR                    | -3.2  | 0.01  |
| PA2322 |             |   | Gluconate permease                                | -11.4 | 0.02  |
| PA2323 |             |   | Probable glyceraldehyde-3-phosphate dehydrogenase | -3.7  | 0.01  |
| PA2377 |             |   | Hypothetical protein                              | -8.5  | 0.05  |
| PA2383 |             |   | Probable transcriptional regulator                | -3.4  | <0.01 |
| PA2384 |             |   | Hypothetical protein                              | -7.4  | <0.01 |
| PA2386 | <i>pvdA</i> |   | L-ornithine N5-oxygenase                          | -3.2  | 0.01  |
| PA2392 | <i>pvdP</i> |   | PvdP                                              | -3.6  | 0.03  |
| PA2393 |             |   | Probable dipeptidase precursor                    | -4.3  | 0.01  |
| PA2403 |             |   | Hypothetical protein                              | -2.9  | 0.01  |
| PA2414 |             | x | L-sorbose dehydrogenase                           | -10.5 | 0.02  |
| PA2415 |             | x | Hypothetical protein                              | -8.6  | 0.02  |
| PA2425 | <i>pvdG</i> |   | PvdG                                              | -3.9  | 0.04  |
| PA2426 | <i>pvdS</i> |   | Sigma factor PvdS                                 | -3.6  | 0.03  |
| PA2427 |             |   | Hypothetical protein                              | -6.9  | 0.01  |
| PA2448 |             |   | Hypothetical protein                              | -3.1  | <0.01 |
| PA2467 | <i>foxR</i> |   | Anti-sigma factor FoxR                            | -2.1  | 0.03  |
| PA2468 | <i>foxI</i> |   | ECF sigma factor FoxI                             | -2.7  | 0.03  |
| PA2564 |             | x | Hypothetical protein                              | -4.0  | 0.04  |
| PA2565 |             |   | Hypothetical protein                              | -4.4  | 0.01  |
| PA2566 |             | x | Conserved hypothetical protein                    | -5.9  | 0.04  |
| PA2570 | <i>lecA</i> | x | LecA                                              | -38.9 | 0.03  |
| PA2587 | <i>pqsH</i> | x | Probable FAD-dependent monooxygenase              | -3.8  | 0.02  |
| PA2588 |             | x | Probable transcriptional regulator                | -8.9  | 0.02  |
| PA2589 |             |   | Hypothetical protein                              | -4.4  | 0.03  |
| PA2591 |             | x | Probable transcriptional regulator                | -3.9  | 0.01  |
| PA2686 | <i>pfeR</i> |   | Two-component response regulator PfeR             | -2.2  | 0.03  |
| PA2753 |             | x | Hypothetical protein                              | -2.3  | 0.04  |
| PA2788 |             |   | Probable chemotaxis transducer                    | -5.8  | 0.03  |
| PA2862 | <i>lipA</i> |   | Lactonizing lipase precursor                      | -2.7  | 0.01  |
| PA3023 |             |   | Conserved hypothetical protein                    | -2.3  | <0.01 |
| PA3094 |             |   | Probable transcriptional regulator                | -2.9  | 0.03  |



|          |              |   |                                                                                                    |        |       |
|----------|--------------|---|----------------------------------------------------------------------------------------------------|--------|-------|
| PA3103   | <i>xcpR</i>  |   | General secretion pathway protein E<br>Probable binding protein component of ABC sugar transporter | -2.2   | 0.02  |
| PA3190   |              |   |                                                                                                    | -2.3   | 0.01  |
| PA3195   | <i>gapA</i>  |   | Glyceraldehyde 3-phosphate dehydrogenase                                                           | -2.3   | 0.05  |
| PA3274   |              | x | Hypothetical protein                                                                               | -3.7   | 0.01  |
| PA3283   |              |   | Conserved hypothetical protein                                                                     | -3.6   | 0.04  |
| PA3284   |              |   | Hypothetical protein                                                                               | -3.0   | <0.01 |
| PA3305.1 | <i>phrS</i>  |   | PhrS                                                                                               | -6.5   | 0.05  |
| PA3326   |              | x | Probable Clp-family ATP-dependent protease                                                         | -12.7  | 0.04  |
| PA3327   |              | x | Probable non-ribosomal peptide synthetase                                                          | -8.1   | 0.02  |
| PA3328   |              | x | Probable FAD-dependent monooxygenase                                                               | -27.0  | 0.01  |
| PA3329   |              | x | Hypothetical protein                                                                               | -11.4  | 0.04  |
| PA3330   |              | x | Probable short chain dehydrogenase                                                                 | -31.5  | 0.03  |
| PA3331   |              | x | Cytochrome P450                                                                                    | -15.9  | 0.03  |
| PA3332   |              | x | Conserved hypothetical protein                                                                     | -19.5  | 0.03  |
| PA3333   | <i>fabH2</i> | x | 3-oxoacyl-[acyl-carrier-protein] synthase III                                                      | -19.0  | 0.03  |
| PA3334   |              | x | Probable acyl carrier protein                                                                      | -14.0  | 0.02  |
| PA3337   | <i>rfaD</i>  |   | ADP-L-glycero-D-mannoheptose 6-epimerase                                                           | -3.3   | 0.04  |
| PA3361   | <i>lecB</i>  | x | Fucose-binding lectin PA-III                                                                       | -35.3  | 0.02  |
| PA3362   |              |   | Hypothetical protein                                                                               | -4.7   | 0.01  |
| PA3407   | <i>hasAp</i> |   | Heme acquisition protein HasAp                                                                     | -2.7   | 0.01  |
| PA3408   | <i>hasR</i>  |   | Haem uptake outer membrane receptor HasR precursor                                                 | -2.2   | 0.03  |
| PA3431   |              |   | Conserved hypothetical protein                                                                     | -6.1   | 0.05  |
| PA3452   | <i>mqaA</i>  |   | Malate:quinone oxidoreductase                                                                      | -2.4   | 0.03  |
| PA3459   |              |   | Probable glutamine amidotransferase                                                                | -3.1   | 0.01  |
| PA3460   |              |   | Probable acetyltransferase                                                                         | -3.7   | 0.05  |
| PA3461   |              |   | Conserved hypothetical protein                                                                     | -4.0   | 0.04  |
| PA3477   | <i>rhlR</i>  | x | Transcriptional regulator RhlR                                                                     | -5.7   | <0.01 |
| PA3478   | <i>rhlB</i>  | x | Rhamnosyltransferase chain B                                                                       | -27.6  | <0.01 |
| PA3479   | <i>rhlA</i>  | x | Rhamnosyltransferase chain A                                                                       | -110.4 | <0.01 |
| PA3510   |              |   | Hypothetical protein                                                                               | -2.1   | 0.05  |
| PA3530   |              |   | Conserved hypothetical protein                                                                     | -4.8   | 0.02  |
| PA3535   |              |   | Probable serine protease                                                                           | -2.9   | 0.02  |
| PA3554   | <i>arnA</i>  |   | ArnA                                                                                               | -3.2   | 0.03  |
| PA3555   | <i>arnD</i>  |   | ArnD                                                                                               | -3.0   | 0.05  |
| PA3557   | <i>arnE</i>  |   | ArnE                                                                                               | -2.9   | <0.01 |
| PA3558   | <i>arnF</i>  |   | ArnF                                                                                               | -3.5   | 0.03  |
| PA3559   |              |   | Probable nucleotide sugar dehydrogenase                                                            | -3.2   | 0.03  |
| PA3621.1 | <i>rsmZ</i>  |   | Regulatory RNA RsmZ                                                                                | -4.0   | 0.04  |
| PA3622   | <i>rpoS</i>  |   | Sigma factor RpoS                                                                                  | -2.0   | <0.01 |
| PA3724   | <i>lasB</i>  | x | Elastase lasB                                                                                      | -124.4 | 0.02  |
| PA3734   |              |   | Hypothetical protein                                                                               | -5.6   | 0.05  |
| PA3808   |              |   | Conserved hypothetical protein                                                                     | -2.1   | 0.03  |

|        |              |   |                                                                                                       |        |       |
|--------|--------------|---|-------------------------------------------------------------------------------------------------------|--------|-------|
| PA3809 | <i>fdx2</i>  |   | Ferredoxin [2Fe-2S]                                                                                   | -2.6   | 0.05  |
| PA3841 | <i>exoS</i>  |   | Exoenzyme S                                                                                           | -3.0   | 0.05  |
| PA3842 |              |   | Probable chaperone                                                                                    | -3.9   | 0.02  |
| PA3843 |              |   | Hypothetical protein                                                                                  | -2.0   | 0.04  |
| PA3899 |              |   | Probable sigma-70 factor, ECF subfamily                                                               | -3.7   | 0.01  |
| PA3906 |              | x | Hypothetical protein                                                                                  | -3.5   | 0.01  |
| PA3908 |              | x | Hypothetical protein                                                                                  | -3.3   | 0.02  |
| PA4078 |              |   | Probable nonribosomal peptide synthetase                                                              | -3.4   | 0.02  |
| PA4116 | <i>bphO</i>  |   | Heme oxygenase, BphO                                                                                  | -2.2   | 0.02  |
| PA4117 | <i>bphP</i>  |   | Bacterial phytochrome, BphP                                                                           | -3.0   | 0.03  |
| PA4138 | <i>tyrS</i>  |   | Tyrosyl-tRNA synthetase                                                                               | -2.3   | 0.04  |
| PA4141 |              | x | Hypothetical protein                                                                                  | -144.7 | 0.02  |
| PA4142 |              | x | Probable secretion protein                                                                            | -43.3  | 0.01  |
| PA4143 |              |   | Probable toxin transporter                                                                            | -20.8  | 0.02  |
| PA4144 |              |   | Probable outer membrane protein precursor                                                             | -16.2  | <0.01 |
| PA4156 |              |   | Probable TonB-dependent receptor                                                                      | -11.5  | <0.01 |
| PA4158 | <i>fepC</i>  |   | Ferric enterobactin transport protein FepC<br>Ferrienterobactin-binding periplasmic protein precursor | -4.0   | 0.03  |
| PA4159 | <i>fepB</i>  |   | FepB                                                                                                  | -9.7   | 0.02  |
| PA4160 | <i>fepD</i>  |   | Ferric enterobactin transport protein FepD                                                            | -5.0   | 0.03  |
| PA4175 | <i>piv</i>   | x | Protease IV                                                                                           | -24.3  | <0.01 |
| PA4209 | <i>phzM</i>  | x | Probable phenazine-specific methyltransferase                                                         | -25.1  | 0.02  |
| PA4213 | <i>phzD1</i> |   | Phenazine biosynthesis protein PhzD                                                                   | -71.8  | 0.05  |
| PA4217 | <i>phzS</i>  |   | Flavin-containing monooxygenase                                                                       | -3.4   | 0.04  |
| PA4227 | <i>pchR</i>  |   | Transcriptional regulator PchR                                                                        | -2.2   | 0.02  |
| PA4294 |              |   | Hypothetical protein                                                                                  | -2.9   | <0.01 |
| PA4338 |              |   | Hypothetical protein                                                                                  | -2.1   | 0.03  |
| PA4377 |              |   | Hypothetical protein                                                                                  | -3.5   | 0.03  |
| PA4394 |              |   | Conserved hypothetical protein                                                                        | -3.2   | 0.01  |
| PA4470 | <i>fumC1</i> |   | Fumarate hydratase                                                                                    | -3.9   | 0.01  |
| PA4471 |              |   | Hypothetical protein                                                                                  | -16.0  | 0.04  |
| PA4570 |              |   | Hypothetical protein                                                                                  | -5.7   | 0.01  |
| PA4585 | <i>rtcA</i>  |   | RNA 3-terminal phosphate cyclase                                                                      | -2.1   | 0.01  |
| PA4586 |              |   | Hypothetical protein                                                                                  | -2.7   | <0.01 |
| PA4587 | <i>ccpR</i>  |   | Cytochrome c551 peroxidase precursor                                                                  | -2.9   | 0.05  |
| PA4588 | <i>gdhA</i>  |   | Glutamate dehydrogenase                                                                               | -4.9   | 0.01  |
| PA4590 | <i>pra</i>   | x | Protein activator                                                                                     | -4.6   | 0.02  |
| PA4675 |              |   | Probable TonB-dependent receptor                                                                      | -3.5   | 0.02  |
| PA4774 |              |   | Hypothetical protein                                                                                  | -2.3   | 0.05  |
| PA4775 |              |   | Hypothetical protein                                                                                  | -2.1   | 0.01  |
| PA4813 | <i>lipC</i>  |   | Lipase LipC                                                                                           | -2.1   | 0.05  |
| PA4847 | <i>accB</i>  |   | Biotin carboxyl carrier protein (BCCP)                                                                | -2.3   | 0.05  |
| PA4925 |              |   | Conserved hypothetical protein                                                                        | -2.5   | 0.04  |

|        |              |                                           |      |      |
|--------|--------------|-------------------------------------------|------|------|
| PA5111 | <i>gloA3</i> | Lactoylglutathione lyase                  | -2.1 | 0.02 |
| PA5150 |              | Probable short-chain dehydrogenase        | -3.2 | 0.02 |
| PA5163 | <i>rmlA</i>  | Glucose-1-phosphate thymidyltransferase   | -2.6 | 0.02 |
| PA5164 | <i>rmlC</i>  | dTDP-4-dehydrorhamnose 3,5-epimerase      | -2.4 | 0.02 |
| PA5172 | <i>arcB</i>  | Ornithine carbamoyltransferase, catabolic | -2.8 | 0.01 |
| PA5220 |              | x Hypothetical protein                    | -8.5 | 0.01 |
| PA5232 |              | x Conserved hypothetical protein          | -2.5 | 0.04 |
| PA5424 |              | Conserved hypothetical protein            | -3.0 | 0.05 |
| PA5475 |              | Hypothetical protein                      | -3.6 | 0.02 |
| PA5526 |              | Hypothetical protein                      | -2.0 | 0.02 |
| PA5531 | <i>tonB1</i> | TonB protein                              | -2.1 | 0.01 |

<sup>a</sup>An 'X' in the box indicates that the gene/protein is regulated by quorum sensing (1), in reference to the QS-regulated genes/proteins as determined previously.

## Reference

1. **Hentzer M, Wu H, Andersen JB, Riedel K, Rasmussen TB, Bagge N, Kumar N, Schembri MA, Song Z, Kristoffersen P, Manefield M, Costerton JW, Molin S, Eberl L, Steinberg P, Kjelleberg S, Høiby N, Givskov M.** 2003. Attenuation of *Pseudomonas aeruginosa* virulence by quorum sensing inhibitors. *EMBO J* **22**:3803-3815.
